# Supplementary material
Source: PubMed Central journal article supplement (PMC4146345)
Supplement: NIHMS622209-supplement-sFigures.pdf [file NIHMS622209-supplement-sFigures.pdf]

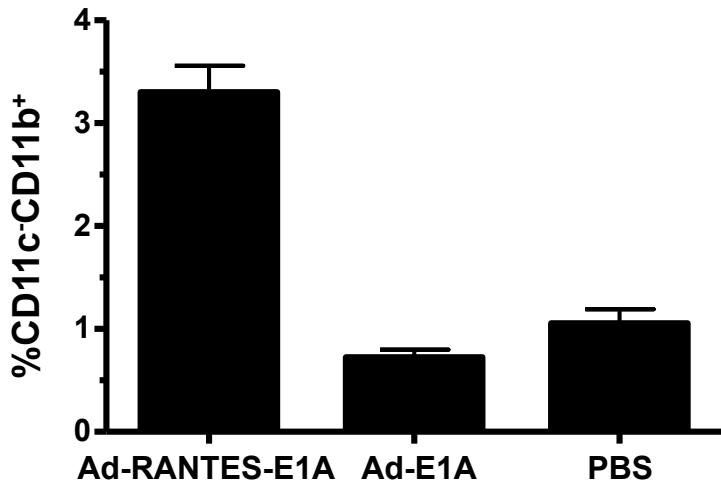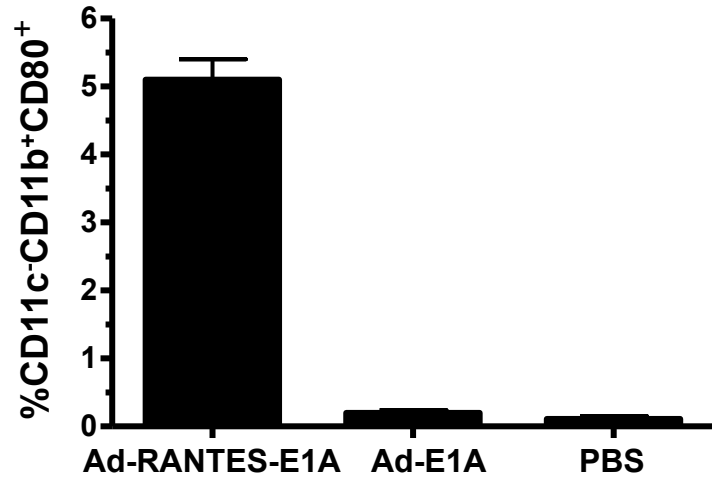

**Supplementary Figure 1:** Mean percentage of CD11c-CD11b<sup>+</sup> macrophages in tumor cell suspensions of three mice (left panel). Maturation status of macrophages was determined by staining with anti-mouse CD80 mAb (right panel).

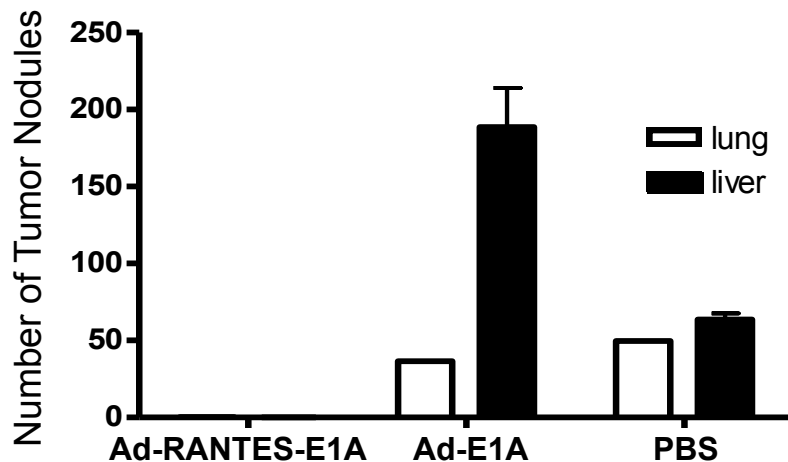

**Supplementary Figure 2:** Mean number of pulmonary and liver tumor nodules ( $\pm$  SEM) shown represents the results from two experiments of two performed (N=3).

Supplementary Fig 3, Lapteva et al

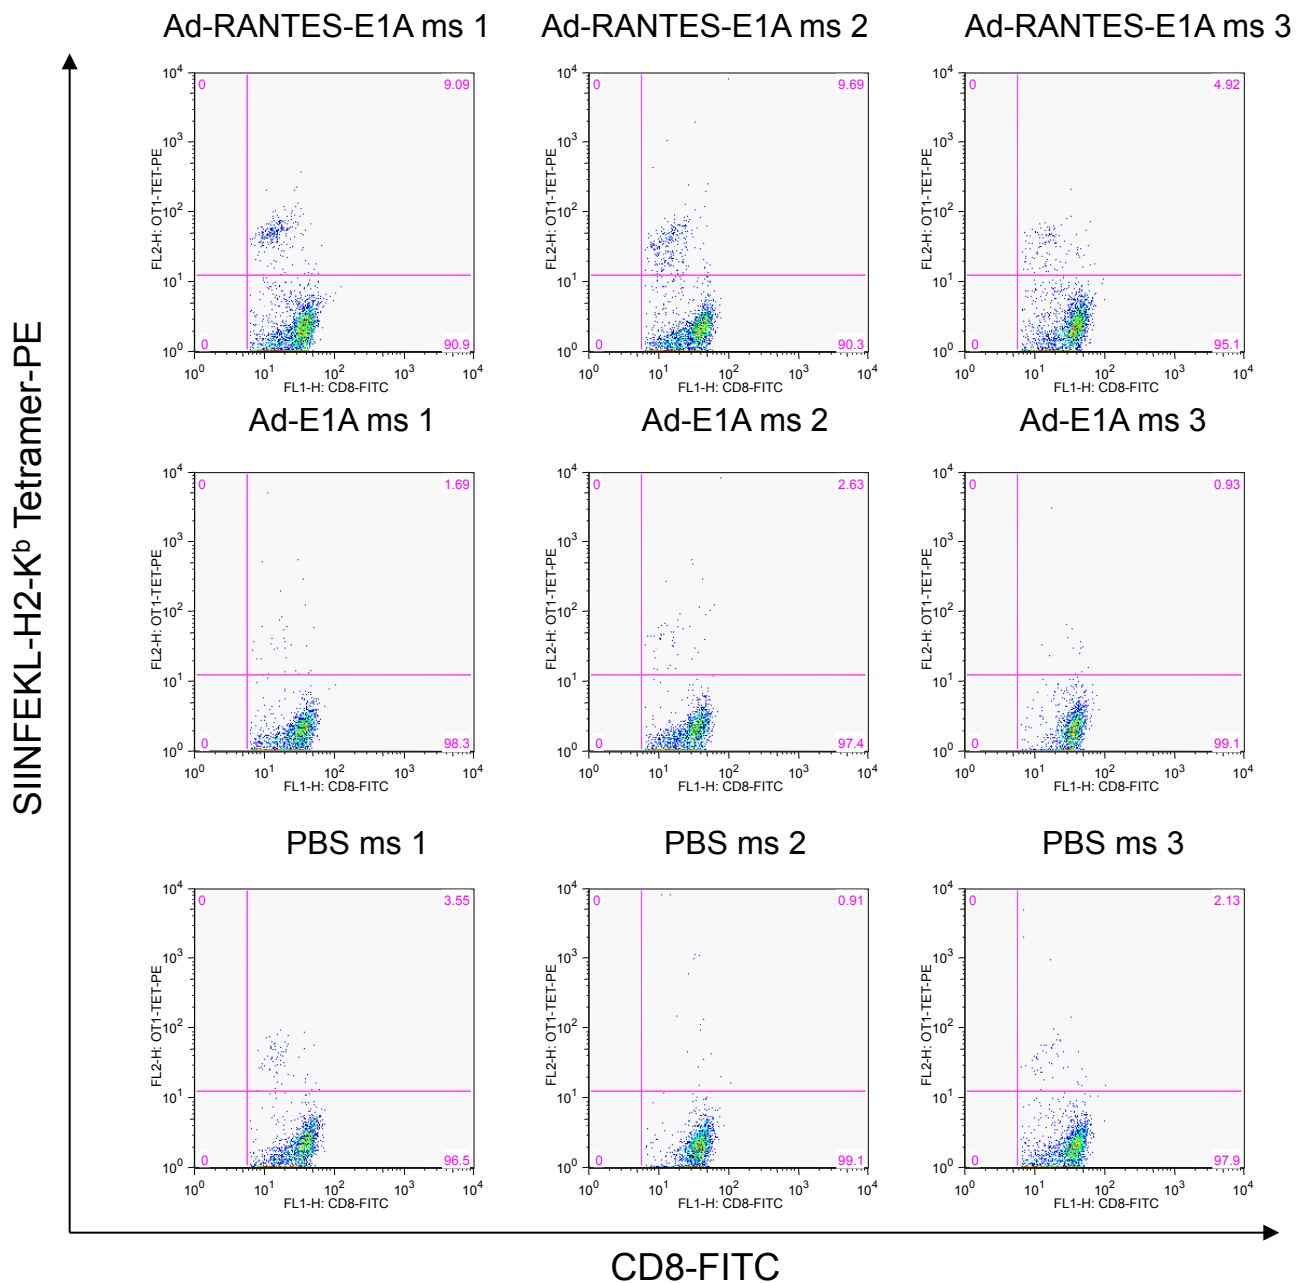

Supplementary Figure 3: Frequency of SIINFEKL TCR positive CD8+ T cells in the peripheral blood of mice. Ms: mouse
