# Supplementary material
Source: PubMed Central journal article supplement (PMC4146345)
Supplement: NIHMS622209-supplement-sTable.pdf [file NIHMS622209-supplement-sTable.pdf]

**Supplementary Table 1.** Raw flow cytometry data for intratumoral CD11c<sup>+</sup> DCs.

|                      | <b>Mouse 1</b> (number of CD11c <sup>+</sup> cells/total number of cells) | <b>Mouse 2</b> (number of CD11c <sup>+</sup> cells/total number of cells) | <b>Mouse 3</b> (number of CD11c <sup>+</sup> cells/total number of cells) |
|----------------------|---------------------------------------------------------------------------|---------------------------------------------------------------------------|---------------------------------------------------------------------------|
| <b>Ad-RANTES-E1A</b> | 1044/ 192,495                                                             | 1486/ 261,270                                                             | 4762/ 690,300                                                             |
| <b>Ad-E1A</b>        | 686/ 526,450                                                              | 471/ 559,650                                                              | 578/ 456,000                                                              |
| <b>PBS</b>           | 558/ 300,900                                                              | 571/ 313,350                                                              | 824/ 363, 900                                                             |
